# Supplementary material for: Hybrid urethanesil coatings for inorganic surfaces produced by isocyanate-free and sol–gel routes: synthesis and characterization
Source: Royal Society of Chemistry journal article supplement (doi:10.1039/c5ra24331a), 2016-01-01
Supplement: c5ra24331a1.pdf [file c5ra24331a1.pdf]

## ***Electronic Supplementary Information***

### **Hybrid Urethanesil Coatings for Inorganic Surfaces Produced by Isocyanate Free and Sol-Gel Routes: Synthesis and Characterizations**

K. M. F. Rossi de Aguiar<sup>a\*</sup>, E. P. Ferreira-Neto<sup>a</sup>, S. Blunk<sup>b</sup>, J. F. Schneider<sup>c</sup>, C. A.  
Picon<sup>d</sup>, C. M. Lepienski<sup>b</sup>, K. Rischka<sup>e</sup>, U.P. Rodrigues-Filho<sup>a</sup>

<sup>a</sup> Institute of Chemistry of São Carlos, University of São Paulo, 13563-120, São Carlos-SP, Brazil.

<sup>b</sup> Department of Physics, Federal University of Paraná, 81531-980, Curitiba- PR, Brazil.

<sup>c</sup> Institute of Physics of São Carlos, University of São Paulo, 13566-590, São Carlos-SP, Brazil.

<sup>d</sup> Engineering Faculty, State University Julio de Mesquita Filho, 15385-000, Ilha Solteira-SP, Brazil.

<sup>e</sup> Fraunhofer Institute for Manufacturing Technology and Advanced Materials IFAM, 28359, Bremen Germany

## ***RSC Advances***

† Correspondence to: Kelen M.F. Rossi de Aguiar (E-mail: [kelen.flores@gmail.com](mailto:kelen.flores@gmail.com))

A) 45%

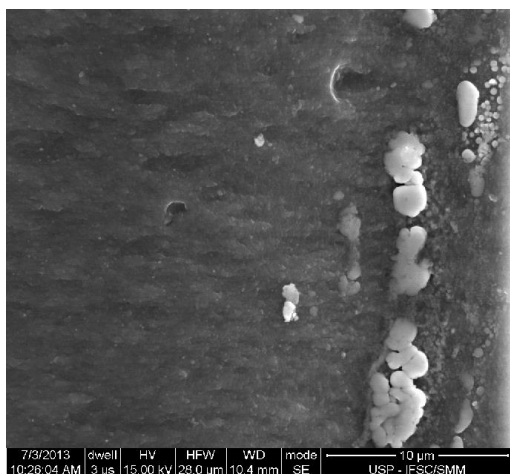

B) 55%

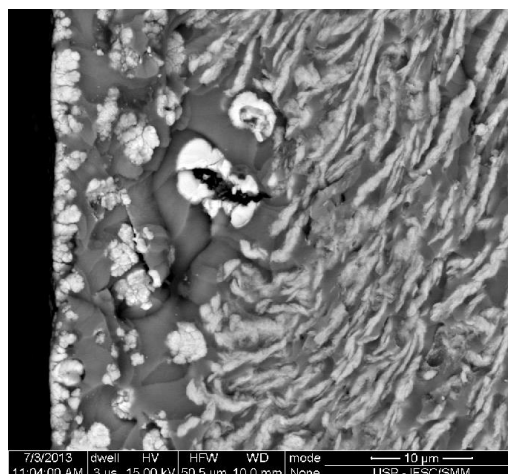

C) 45%

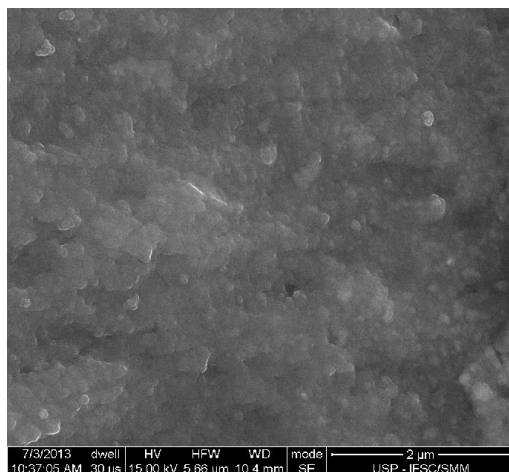

**Fig.S1.** Cross-section of the hybrid films PDMSUr containing 45% (A), 55% (B) and 45 wt% (C) of PWA in high magnification (scale bar: [A,B] = 10  $\mu$ m; [C] = 2  $\mu$ m).

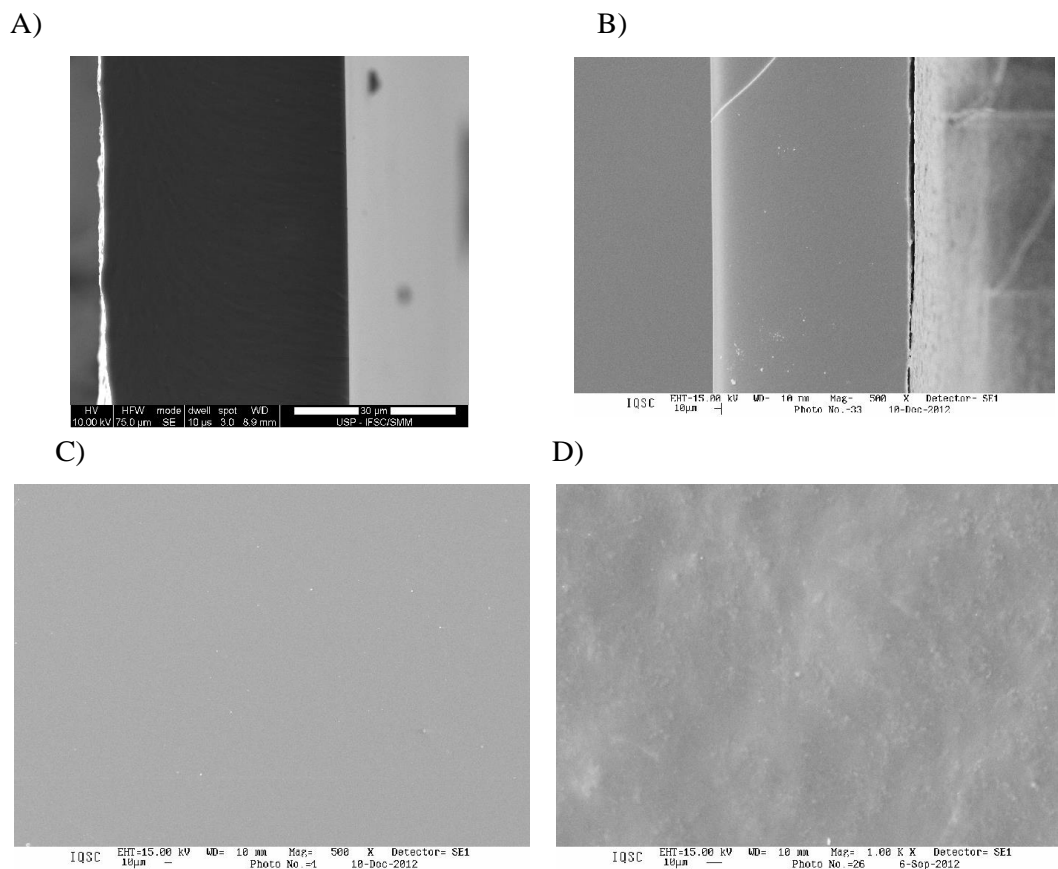

**Fig.S2.** (A), (B) Cross-section of the hybrid films PDMSUr containing 35 wt % (A) and 45 wt % (B) in low magnification. (C) and (D) images are from the surface of the hybrid films. Figure A was taken using a Field Emission Gun (FEG) microscope and Figures B, C and D were taken in Scanning Electron microscope (SEM).

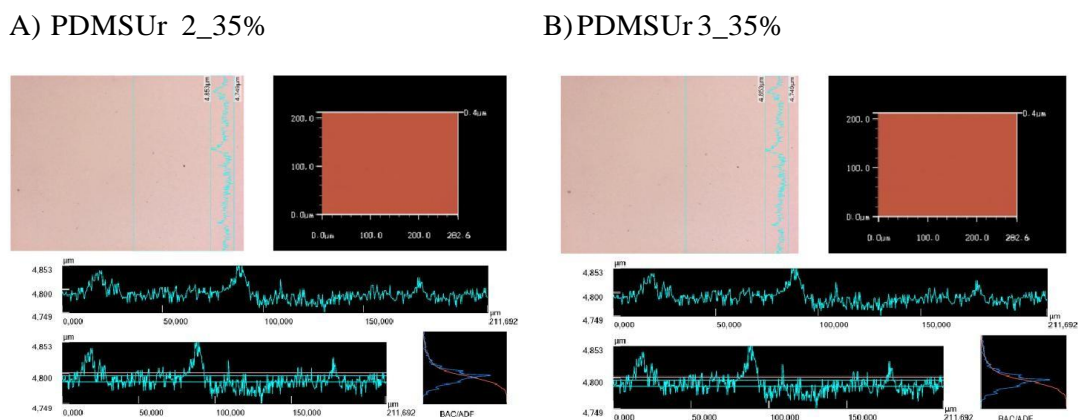

**Fig.S3.** Confocal images of the A) PDMSUr 2 and B) PDMSUr 3 hybrid matrices containing 35 wt% PWA used for roughness measurements.
